# Supplementary material
Source: publisher site journal article supplement (https://www.dovepress.com/article/378564)
Supplement: Supplementary file 1 [file get_supplementary_file.php]

# **Supplementary materials**

**Supplementary Tables**

**Table S1.** Detailed results of multivariable logistic regression for poor sleep quality (PSQI>5)

**Table S2.** Detailed results of multivariable logistic regression for poor sleep quality (PSQI>9)

**Table S3.** Detailed results of multivariable logistic regression for high-risk obstructive sleep apnea (OSA)

**Table S4.** Characteristics of military service members according to positions

**Table S5.** Results of the dietary habit survey questionnaire administered among the military service members

## **Table S1.** Detailed results of multivariable logistic regression for poor sleep quality (PSQI > 5)

|  |  | PSQI ≤ 5 (n=1,810) | PSQI > 5 (n=2,579) | OR (univariable) | OR (multivariable) | Overall effect |
| --- | --- | --- | --- | --- | --- | --- |
| ***Dietary behaviors*** | |  |  |  |  |  |
| Skipping breakfast | None | 1392 (76.9) | 1658 (64.3) | - | - | X2 = 8.0, df = 4, P(> X2) = 0.092 |
| 1-2/week | 269 (14.9) | 536 (20.8) | 1.67 (1.42-1.97, p<0.001) | 1.23 (1.02-1.47, p=0.029) |  |
| 3-4/ week | 94 (5.2) | 242 (9.4) | 2.16 (1.69-2.78, p<0.001) | 1.28 (0.97-1.70, p=0.082) |  |
| 5-6/week | 29 (1.6) | 91 (3.5) | 2.63 (1.75-4.09, p<0.001) | 1.42 (0.90-2.30, p=0.141) |  |
| 7/week | 26 (1.4) | 52 (2.0) | 1.68 (1.05-2.74, p=0.033) | 1.17 (0.69-2.04, p=0.564) |  |
| Overeating | None | 1104 (61.0) | 1312 (50.9) | - | - | X2 = 8.6, df = 4, P(> X2) = 0.073 |
| 1-2/week | 549 (30.3) | 922 (35.8) | 1.41 (1.24-1.61, p<0.001) | 1.17 (1.00-1.36, p=0.048) |  |
| 3-4/ week | 108 (6.0) | 259 (10.0) | 2.02 (1.59-2.57, p<0.001) | 1.39 (1.06-1.83, p=0.019) |  |
| 5-6/week | 20 (1.1) | 42 (1.6) | 1.77 (1.05-3.09, p=0.038) | 0.92 (0.51-1.73, p=0.796) |  |
| 7/week | 29 (1.6) | 44 (1.7) | 1.28 (0.80-2.07, p=0.314) | 0.87 (0.50-1.54, p=0.634) |  |
| Snack | None | 218 (12.0) | 200 (7.8) | - | - | X2 = 13.6, df = 6, P(> X2) = 0.035 |
| 1-2/week | 484 (26.7) | 681 (26.4) | 1.53 (1.23-1.92, p<0.001) | 1.50 (1.16-1.94, p=0.002) |  |
| 3-4/week | 408 (22.5) | 569 (22.1) | 1.52 (1.21-1.91, p<0.001) | 1.41 (1.08-1.85, p=0.011) |  |
| 5-6/week | 122 (6.7) | 190 (7.4) | 1.70 (1.26-2.29, p<0.001) | 1.40 (1.00-1.96, p=0.052) |  |
| 1/day | 314 (17.3) | 470 (18.2) | 1.63 (1.28-2.07, p<0.001) | 1.43 (1.09-1.89, p=0.010) |  |
| 2/day | 190 (10.5) | 310 (12.0) | 1.78 (1.37-2.32, p<0.001) | 1.40 (1.04-1.90, p=0.029) |  |
| ≥ 3/day | 74 (4.1) | 159 (6.2) | 2.34 (1.68-3.29, p<0.001) | 1.89 (1.29-2.80, p=0.001) |  |
| Night meal | None | 1101 (60.8) | 1307 (50.7) | - | - | X2 = 29.6, df = 5, P(> X2) = 1.8e-05 |
| 1-3/month | 275 (15.2) | 419 (16.2) | 1.28 (1.08-1.53, p=0.004) | 1.08 (0.89-1.31, p=0.436) |  |
| 1-2/week | 325 (18.0) | 551 (21.4) | 1.43 (1.22-1.68, p<0.001) | 1.14 (0.95-1.37, p=0.158) |  |
| 3-4/ week | 78 (4.3) | 205 (7.9) | 2.21 (1.69-2.92, p<0.001) | 1.83 (1.35-2.48, p<0.001) |  |
| 5-6/week | 7 (0.4) | 45 (1.7) | 5.42 (2.60-13.19, p<0.001) | 5.54 (2.49-14.18, p<0.001) |  |
| 7/week | 24 (1.3) | 52 (2.0) | 1.83 (1.13-3.03, p=0.016) | 1.40 (0.81-2.47, p=0.241) |  |
| ***Demographics and Lifestyle*** | |  |  |  |  |  |
| Age, years | Mean (SD) | 20.7 (1.2) | 20.9 (1.3) | 1.18 (1.12-1.24, p<0.001) | 1.11 (1.05-1.17, p=0.001) | X2 = 11.9, df = 1, P(> X2) = 0.00055 |
| BMI, kg/m2 | Mean (SD) | 23.8 (2.9) | 23.9 (2.8) | 1.01 (0.99-1.03, p=0.524) | 1.00 (0.97-1.02, p=0.852) | X2 = 0.035, df = 1, P(> X2) = 0.85 |
| Smoking | Never | 1035 (57.2) | 1288 (49.9) | - | - | X2 = 5.6, df = 2, P(> X2) = 0.06 |
| Past smoker | 96 (5.3) | 165 (6.4) | 1.38 (1.06-1.80, p=0.017) | 1.24 (0.92-1.66, p=0.155) |  |
| Current smoker | 679 (37.5) | 1126 (43.7) | 1.33 (1.18-1.51, p<0.001) | 1.18 (1.02-1.38, p=0.029) |  |
| Drinking | < 1/month | 468 (25.9) | 571 (22.1) | - | - | X2 = 5.7, df = 3, P(> X2) = 0.12 |
| < 1/week | 516 (28.5) | 698 (27.1) | 1.11 (0.94-1.31, p=0.226) | 1.08 (0.90-1.31, p=0.394) |  |
| 1-2/week | 609 (33.6) | 888 (34.4) | 1.20 (1.02-1.40, p=0.029) | 1.19 (0.99-1.43, p=0.065) |  |
| 3-7/week | 217 (12.0) | 422 (16.4) | 1.59 (1.30-1.96, p<0.001) | 1.31 (1.03-1.67, p=0.030) |  |
| Exercise | < 1/week | 265 (14.6) | 444 (17.2) | - | - | X2 = 4.0, df = 3, P(> X2) = 0.26 |
| 1-2/week | 436 (24.1) | 622 (24.1) | 0.85 (0.70-1.03, p=0.107) | 0.88 (0.71-1.09, p=0.244) |  |
| 3-4/week | 533 (29.4) | 717 (27.8) | 0.80 (0.66-0.97, p=0.023) | 0.85 (0.69-1.05, p=0.136) |  |
| ≥ 5/week | 576 (31.8) | 796 (30.9) | 0.82 (0.68-0.99, p=0.043) | 0.81 (0.65-1.00, p=0.049) |  |
| Stress | Very low | 268 (14.8) | 98 (3.8) | - | - | X2 = 375.1, df = 4, P(> X2) < 0.00001 |
| Low | 377 (20.8) | 233 (9.0) | 1.69 (1.28-2.25, p<0.001) | 1.70 (1.26-2.29, p<0.001) |  |
| Moderate | 870 (48.1) | 1100 (42.7) | 3.46 (2.71-4.45, p<0.001) | 3.24 (2.51-4.22, p<0.001) |  |
| High | 221 (12.2) | 848 (32.9) | 10.49 (8.00-13.86, p<0.001) | 9.21 (6.93-12.33, p<0.001) |  |
| Very high | 74 (4.1) | 300 (11.6) | 11.09 (7.90-15.73, p<0.001) | 9.44 (6.62-13.59, p<0.001) |  |
| Coffee | < 1/week | 734 (40.6) | 912 (35.4) | - | - | X2 = 11.5, df = 5, P(> X2) = 0.042 |
| 1-2/week | 440 (24.3) | 551 (21.4) | 1.01 (0.86-1.18, p=0.923) | 0.95 (0.79-1.13, p=0.541) |  |
| 3-6/week | 291 (16.1) | 439 (17.0) | 1.21 (1.02-1.45, p=0.032) | 1.09 (0.90-1.34, p=0.375) |  |
| 1/day | 202 (11.2) | 350 (13.6) | 1.39 (1.14-1.70, p=0.001) | 1.21 (0.97-1.51, p=0.100) |  |
| 2/day | 98 (5.4) | 214 (8.3) | 1.76 (1.36-2.28, p<0.001) | 1.35 (1.02-1.81, p=0.040) |  |
| ≥ 3/day | 45 (2.5) | 113 (4.4) | 2.02 (1.42-2.92, p<0.001) | 1.51 (1.02-2.27, p=0.044) |  |
| ***Occupational factors*** | |  |  |  |  |  |
| Rank | Private | 192 (10.6) | 131 (5.1) | - | - | X2 = 9.7, df = 3, P(> X2) = 0.021 |
| Private First Class | 807 (44.6) | 1048 (40.6) | 1.90 (1.50-2.42, p<0.001) | 1.44 (1.10-1.89, p=0.007) |  |
| Corporal | 583 (32.2) | 1068 (41.4) | 2.68 (2.11-3.43, p<0.001) | 1.49 (1.13-1.97, p=0.005) |  |
| Sergeant | 228 (12.6) | 332 (12.9) | 2.13 (1.62-2.82, p<0.001) | 1.26 (0.92-1.74, p=0.151) |  |
| Position | Combat arms | 1246 (68.8) | 1725 (66.9) | - | - | X2 = 17.5, df = 3, P(> X2) = 0.00057 |
| Driver | 250 (13.8) | 255 (9.9) | 0.74 (0.61-0.89, p=0.002) | 0.79 (0.64-0.98, p=0.030) |  |
| Military chef | 48 (2.7) | 107 (4.1) | 1.61 (1.14-2.30, p=0.007) | 1.81 (1.23-2.71, p=0.003) |  |
| Administration | 266 (14.7) | 492 (19.1) | 1.34 (1.13-1.58, p=0.001) | 1.15 (0.96-1.40, p=0.135) |  |
| Night-shift with duty-off | None | 1071 (59.2) | 1391 (53.9) | - | - | X2 = 28.3, df = 5, P(> X2) = 3.2e-05 |
| <1/month | 113 (6.2) | 123 (4.8) | 0.84 (0.64-1.10, p=0.196) | 0.88 (0.65-1.18, p=0.390) |  |
| 2/month | 167 (9.2) | 205 (7.9) | 0.95 (0.76-1.18, p=0.614) | 1.00 (0.78-1.28, p=0.999) |  |
| 3/month | 177 (9.8) | 253 (9.8) | 1.10 (0.89-1.36, p=0.366) | 1.06 (0.83-1.34, p=0.654) |  |
| 4/month | 122 (6.7) | 177 (6.9) | 1.12 (0.88-1.43, p=0.374) | 1.08 (0.82-1.42, p=0.578) |  |
| ≥ 5/month | 160 (8.8) | 430 (16.7) | 2.07 (1.70-2.53, p<0.001) | 1.81 (1.44-2.28, p<0.001) |  |
| Night-shift without duty-off | None | 1090 (60.2) | 1333 (51.7) | - | - | X2 = 47.1, df = 5, P(> X2) = 5.4e-09 |
| <1/month | 59 (3.3) | 95 (3.7) | 1.32 (0.95-1.85, p=0.107) | 1.20 (0.83-1.75, p=0.331) |  |
| 2/month | 80 (4.4) | 108 (4.2) | 1.10 (0.82-1.49, p=0.518) | 1.07 (0.76-1.49, p=0.710) |  |
| 3/month | 80 (4.4) | 99 (3.8) | 1.01 (0.75-1.38, p=0.939) | 1.02 (0.73-1.43, p=0.894) |  |
| 4/month | 95 (5.2) | 123 (4.8) | 1.06 (0.80-1.40, p=0.689) | 1.33 (0.98-1.81, p=0.069) |  |
| ≥ 5/month | 406 (22.4) | 821 (31.8) | 1.65 (1.43-1.91, p<0.001) | 1.75 (1.49-2.06, p<0.001) |  |

Odds ratio (OR), 95% confidence intervals, and p-value are presented. Pittsburgh sleep quality index (PSQI). Body mass index (BMI)

## **Table S2.** Detailed results of multivariable logistic regression for poor sleep quality (PSQI > 9)

|  |  | PSQI ≤ 9 (n=3,486) | PSQI > 9 (n=903) | OR (univariable) | OR (multivariable) | Overall effect |
| --- | --- | --- | --- | --- | --- | --- |
| ***Dietary behaviors*** | |  |  |  |  |  |
| Skipping breakfast | None | 2533 (72.7) | 517 (57.3) | - | - | X2 = 20.9, df = 4, P(> X2) = 0.00033 |
| 1-2/week | 596 (17.1) | 209 (23.1) | 1.72 (1.43-2.06, p<0.001) | 1.31 (1.06-1.62, p=0.011) |  |
| 3-4/ week | 229 (6.6) | 107 (11.8) | 2.29 (1.78-2.93, p<0.001) | 1.36 (1.01-1.82, p=0.041) |  |
| 5-6/week | 68 (2.0) | 52 (5.8) | 3.75 (2.57-5.43, p<0.001) | 2.25 (1.45-3.45, p<0.001) |  |
| 7/week | 60 (1.7) | 18 (2.0) | 1.47 (0.84-2.46, p=0.158) | 0.72 (0.38-1.33, p=0.309) |  |
| Overeating | None | 2000 (57.4) | 416 (46.1) | - | - | X2 = 11.2, df = 4, P(> X2) = 0.025 |
| 1-2/week | 1144 (32.8) | 327 (36.2) | 1.37 (1.17-1.62, p<0.001) | 1.15 (0.95-1.38, p=0.154) |  |
| 3-4/ week | 243 (7.0) | 124 (13.7) | 2.45 (1.92-3.12, p<0.001) | 1.62 (1.21-2.17, p=0.001) |  |
| 5-6/week | 44 (1.3) | 18 (2.0) | 1.97 (1.10-3.38, p=0.018) | 1.03 (0.53-1.93, p=0.932) |  |
| 7/week | 55 (1.6) | 18 (2.0) | 1.57 (0.89-2.65, p=0.102) | 1.00 (0.51-1.87, p=0.991) |  |
| Snack | None | 353 (10.1) | 65 (7.2) | - | - | X2 = 10.6, df = 6, P(> X2) = 0.1 |
| 1-2/week | 923 (26.5) | 242 (26.8) | 1.42 (1.06-1.93, p=0.021) | 1.50 (1.07-2.13, p=0.019) |  |
| 3-4/week | 783 (22.5) | 194 (21.5) | 1.35 (0.99-1.84, p=0.059) | 1.36 (0.96-1.95, p=0.091) |  |
| 5-6/week | 238 (6.8) | 74 (8.2) | 1.69 (1.17-2.45, p=0.006) | 1.46 (0.95-2.24, p=0.083) |  |
| 1/day | 638 (18.3) | 146 (16.2) | 1.24 (0.91-1.72, p=0.183) | 1.14 (0.79-1.66, p=0.484) |  |
| 2/day | 384 (11.0) | 116 (12.8) | 1.64 (1.18-2.31, p=0.004) | 1.34 (0.91-1.98, p=0.140) |  |
| ≥ 3/day | 167 (4.8) | 66 (7.3) | 2.15 (1.45-3.17, p<0.001) | 1.71 (1.08-2.68, p=0.021) |  |
| Night meal | None | 1986 (57.0) | 422 (46.7) | - | - | X2 = 22.2, df = 5, P(> X2) = 0.00047 |
| 1-3/month | 559 (16.0) | 135 (15.0) | 1.14 (0.91-1.41, p=0.244) | 0.92 (0.72-1.18, p=0.522) |  |
| 1-2/week | 653 (18.7) | 223 (24.7) | 1.61 (1.33-1.93, p<0.001) | 1.39 (1.12-1.73, p=0.003) |  |
| 3-4/ week | 200 (5.7) | 83 (9.2) | 1.95 (1.48-2.57, p<0.001) | 1.71 (1.24-2.36, p=0.001) |  |
| 5-6/week | 34 (1.0) | 18 (2.0) | 2.49 (1.37-4.40, p=0.002) | 2.08 (1.03-4.09, p=0.037) |  |
| 7/week | 54 (1.5) | 22 (2.4) | 1.92 (1.13-3.14, p=0.012) | 1.24 (0.67-2.25, p=0.483) |  |
| ***Demographics and Lifestyle*** | |  |  |  |  |  |
| Age, years | Mean (SD) | 20.7 (1.2) | 21.1 (1.4) | 1.22 (1.16-1.29, p<0.001) | 1.17 (1.10-1.24, p<0.001) | X2 = 23.5, df = 1, P(> X2) = 1.2e-06 |
| BMI, kg/m2 | Mean (SD) | 23.8 (2.9) | 23.9 (2.9) | 1.01 (0.98-1.03, p=0.635) | 0.99 (0.96-1.02, p=0.537) | X2 = 0.38, df = 1, P(> X2) = 0.54 |
| Smoking | Never | 1907 (54.7) | 416 (46.1) | - | - | X2 = 4.8, df = 2, P(> X2) = 0.091 |
| Past smoker | 194 (5.6) | 67 (7.4) | 1.58 (1.17-2.12, p=0.002) | 1.39 (0.99-1.94, p=0.053) |  |
| Current smoker | 1385 (39.7) | 420 (46.5) | 1.39 (1.19-1.62, p<0.001) | 1.16 (0.96-1.39, p=0.128) |  |
| Drinking | < 1/month | 847 (24.3) | 192 (21.3) | - | - | X2 = 9.5, df = 3, P(> X2) = 0.023 |
| < 1/week | 987 (28.3) | 227 (25.1) | 1.01 (0.82-1.26, p=0.894) | 0.97 (0.76-1.23, p=0.779) |  |
| 1-2/week | 1202 (34.5) | 295 (32.7) | 1.08 (0.89-1.33, p=0.441) | 1.08 (0.85-1.36, p=0.543) |  |
| 3-7/week | 450 (12.9) | 189 (20.9) | 1.85 (1.47-2.34, p<0.001) | 1.43 (1.08-1.89, p=0.011) |  |
| Exercise | < 1/week | 543 (15.6) | 166 (18.4) | - | - | X2 = 8.7, df = 3, P(> X2) = 0.033 |
| 1-2/week | 868 (24.9) | 190 (21.0) | 0.72 (0.57-0.91, p=0.005) | 0.72 (0.55-0.94, p=0.016) |  |
| 3-4/week | 1008 (28.9) | 242 (26.8) | 0.79 (0.63-0.98, p=0.034) | 0.87 (0.68-1.12, p=0.280) |  |
| ≥ 5/week | 1067 (30.6) | 305 (33.8) | 0.94 (0.75-1.16, p=0.541) | 0.99 (0.77-1.27, p=0.910) |  |
| Stress | Very low | 358 (10.3) | 8 (0.9) | - | - | X2 = 354.0, df = 4, P(> X2) < 0.00001 |
| Low | 566 (16.2) | 44 (4.9) | 3.48 (1.71-8.06, p=0.001) | 3.32 (1.61-7.74, p=0.002) |  |
| Moderate | 1687 (48.4) | 283 (31.3) | 7.51 (3.94-16.67, p<0.001) | 6.64 (3.46-14.85, p<0.001) |  |
| High | 693 (19.9) | 376 (41.6) | 24.28 (12.75-53.93, p<0.001) | 20.28 (10.54-45.35, p<0.001) |  |
| Very high | 182 (5.2) | 192 (21.3) | 47.21 (24.26-106.35, p<0.001) | 40.10 (20.33-91.20, p<0.001) |  |
| Coffee | < 1/week | 1349 (38.7) | 297 (32.9) | - | - | X2 = 17.2, df = 5, P(> X2) = 0.0042 |
| 1-2/week | 806 (23.1) | 185 (20.5) | 1.04 (0.85-1.28, p=0.688) | 1.02 (0.82-1.28, p=0.837) |  |
| 3-6/week | 590 (16.9) | 140 (15.5) | 1.08 (0.86-1.34, p=0.510) | 0.95 (0.74-1.23, p=0.713) |  |
| 1/day | 424 (12.2) | 128 (14.2) | 1.37 (1.08-1.73, p=0.008) | 1.19 (0.91-1.55, p=0.210) |  |
| 2/day | 213 (6.1) | 99 (11.0) | 2.11 (1.61-2.76, p<0.001) | 1.60 (1.17-2.18, p=0.003) |  |
| ≥ 3/day | 104 (3.0) | 54 (6.0) | 2.36 (1.65-3.34, p<0.001) | 1.72 (1.15-2.56, p=0.008) |  |
| ***Occupational factors*** | |  |  |  |  |  |
| Rank | Private | 286 (8.2) | 37 (4.1) | - | - | X2 = 0.54, df = 3, P(> X2) = 0.91 |
| Private First Class | 1520 (43.6) | 335 (37.1) | 1.70 (1.20-2.48, p=0.004) | 1.07 (0.73-1.62, p=0.722) |  |
| Corporal | 1251 (35.9) | 400 (44.3) | 2.47 (1.75-3.60, p<0.001) | 1.06 (0.71-1.60, p=0.783) |  |
| Sergeant | 429 (12.3) | 131 (14.5) | 2.36 (1.61-3.54, p<0.001) | 1.15 (0.74-1.81, p=0.541) |  |
| Position | Combat arms | 2369 (68.0) | 602 (66.7) | - | - | X2 = 1.8, df = 3, P(> X2) = 0.61 |
| Driver | 427 (12.2) | 78 (8.6) | 0.72 (0.55-0.92, p=0.012) | 0.87 (0.65-1.16, p=0.349) |  |
| Military chef | 118 (3.4) | 37 (4.1) | 1.23 (0.83-1.79, p=0.278) | 1.16 (0.73-1.80, p=0.528) |  |
| Administration | 572 (16.4) | 186 (20.6) | 1.28 (1.06-1.54, p=0.010) | 1.06 (0.85-1.32, p=0.574) |  |
| Night-shift with duty-off | None | 1985 (56.9) | 477 (52.8) | - | - | X2 = 38.3, df = 5, P(> X2) = 3.3e-07 |
| <1/month | 196 (5.6) | 40 (4.4) | 0.85 (0.59-1.20, p=0.366) | 0.87 (0.58-1.28, p=0.505) |  |
| 2/month | 314 (9.0) | 58 (6.4) | 0.77 (0.57-1.03, p=0.083) | 0.80 (0.57-1.11, p=0.196) |  |
| 3/month | 352 (10.1) | 78 (8.6) | 0.92 (0.70-1.20, p=0.549) | 0.79 (0.58-1.06, p=0.116) |  |
| 4/month | 250 (7.2) | 49 (5.4) | 0.82 (0.59-1.12, p=0.215) | 0.71 (0.49-1.01, p=0.064) |  |
| ≥ 5/month | 389 (11.2) | 201 (22.3) | 2.15 (1.76-2.62, p<0.001) | 1.77 (1.39-2.25, p<0.001) |  |
| Night-shift without duty-off | None | 1983 (56.9) | 440 (48.7) | - | - | X2 = 26.8, df = 5, P(> X2) = 6.3e-05 |
| <1/month | 118 (3.4) | 36 (4.0) | 1.37 (0.92-2.00, p=0.107) | 1.30 (0.83-1.98, p=0.243) |  |
| 2/month | 153 (4.4) | 35 (3.9) | 1.03 (0.69-1.49, p=0.875) | 1.11 (0.72-1.67, p=0.640) |  |
| 3/month | 143 (4.1) | 36 (4.0) | 1.13 (0.77-1.64, p=0.515) | 1.20 (0.78-1.81, p=0.403) |  |
| 4/month | 180 (5.2) | 38 (4.2) | 0.95 (0.65-1.36, p=0.789) | 1.27 (0.84-1.87, p=0.252) |  |
| ≥ 5/month | 909 (26.1) | 318 (35.2) | 1.58 (1.34-1.86, p<0.001) | 1.65 (1.37-2.00, p<0.001) |  |

Odds ratio (OR), 95% confidence intervals, and p-value are presented. Pittsburgh sleep quality index (PSQI), Body mass index (BMI)

## **Table S3.** Detailed results of multivariable logistic regression for high-risk obstructive sleep apnea (OSA)

|  |  | Low-risk OSA (n=3,775) | High-risk OSA (n=614) | OR (univariable) | OR (multivariable) | Overall effect |
| --- | --- | --- | --- | --- | --- | --- |
| ***Dietary behaviors*** | |  |  |  |  |  |
| Skipping breakfast | None | 2655 (70.3) | 395 (64.3) | - | - | X2 = 9.3, df = 4, P(> X2) = 0.054 |
| 1-2/week | 683 (18.1) | 122 (19.9) | 1.20 (0.96-1.49, p=0.103) | 1.13 (0.88-1.45, p=0.329) |  |
| 3-4/ week | 283 (7.5) | 53 (8.6) | 1.26 (0.91-1.71, p=0.148) | 0.94 (0.65-1.33, p=0.722) |  |
| 5-6/week | 100 (2.6) | 20 (3.3) | 1.34 (0.80-2.15, p=0.238) | 0.91 (0.51-1.55, p=0.734) |  |
| 7/week | 54 (1.4) | 24 (3.9) | 2.99 (1.80-4.83, p<0.001) | 2.28 (1.27-4.03, p=0.005) |  |
| Overeating | None | 2143 (56.8) | 273 (44.5) | - | - | X2 = 9.1, df = 4, P(> X2) = 0.06 |
| 1-2/week | 1260 (33.4) | 211 (34.4) | 1.31 (1.08-1.59, p=0.005) | 0.94 (0.76-1.17, p=0.599) |  |
| 3-4/ week | 278 (7.4) | 89 (14.5) | 2.51 (1.91-3.28, p<0.001) | 1.41 (1.02-1.95, p=0.036) |  |
| 5-6/week | 43 (1.1) | 19 (3.1) | 3.47 (1.95-5.95, p<0.001) | 1.65 (0.83-3.18, p=0.143) |  |
| 7/week | 51 (1.4) | 22 (3.6) | 3.39 (1.99-5.60, p<0.001) | 1.51 (0.79-2.80, p=0.204) |  |
| Snack | None | 374 (9.9) | 44 (7.2) | - | - | X2 = 7.8, df = 6, P(> X2) = 0.25 |
| 1-2/week | 1000 (26.5) | 165 (26.9) | 1.40 (0.99-2.02, p=0.060) | 1.35 (0.92-2.02, p=0.132) |  |
| 3-4/week | 861 (22.8) | 116 (18.9) | 1.15 (0.80-1.67, p=0.470) | 1.00 (0.67-1.53, p=0.994) |  |
| 5-6/week | 268 (7.1) | 44 (7.2) | 1.40 (0.89-2.18, p=0.143) | 1.11 (0.68-1.84, p=0.669) |  |
| 1/day | 664 (17.6) | 120 (19.5) | 1.54 (1.07-2.24, p=0.022) | 1.28 (0.85-1.96, p=0.247) |  |
| 2/day | 415 (11.0) | 85 (13.8) | 1.74 (1.19-2.59, p=0.005) | 1.42 (0.92-2.23, p=0.119) |  |
| ≥ 3/day | 193 (5.1) | 40 (6.5) | 1.76 (1.11-2.80, p=0.016) | 1.32 (0.77-2.25, p=0.307) |  |
| Night meal | None | 2105 (55.8) | 303 (49.3) | - | - | X2 = 13.2, df = 5, P(> X2) = 0.021 |
| 1-3/month | 599 (15.9) | 95 (15.5) | 1.10 (0.86-1.41, p=0.443) | 1.02 (0.77-1.34, p=0.904) |  |
| 1-2/week | 744 (19.7) | 132 (21.5) | 1.23 (0.99-1.53, p=0.063) | 1.21 (0.94-1.55, p=0.145) |  |
| 3-4/ week | 230 (6.1) | 53 (8.6) | 1.60 (1.15-2.19, p=0.004) | 1.61 (1.10-2.33, p=0.012) |  |
| 5-6/week | 41 (1.1) | 11 (1.8) | 1.86 (0.90-3.54, p=0.071) | 1.62 (0.70-3.48, p=0.238) |  |
| 7/week | 56 (1.5) | 20 (3.3) | 2.48 (1.44-4.12, p=0.001) | 2.30 (1.21-4.22, p=0.009) |  |
| ***Demographics and Lifestyle*** | |  |  |  |  |  |
| Age, years | Mean (SD) | 20.8 (1.3) | 20.9 (1.3) | 1.08 (1.01-1.14, p=0.022) | 1.01 (0.93-1.08, p=0.864) | X2 = 0.029, df = 1, P(> X2) = 0.86 |
| BMI, kg/m2 | Mean (SD) | 23.5 (2.5) | 25.8 (3.7) | 1.29 (1.26-1.33, p<0.001) | 1.30 (1.26-1.34, p<0.001) | X2 = 255.1, df = 1, P(> X2) < 0.00001 |
| Smoking | Never | 2014 (53.4) | 309 (50.3) | - | - | X2 = 0.34, df = 2, P(> X2) = 0.84 |
| Past smoker | 224 (5.9) | 37 (6.0) | 1.08 (0.74-1.54, p=0.694) | 0.97 (0.64-1.44, p=0.880) |  |
| Current smoker | 1537 (40.7) | 268 (43.6) | 1.14 (0.95-1.36, p=0.156) | 1.06 (0.85-1.31, p=0.611) |  |
| Drinking | < 1/month | 900 (23.8) | 139 (22.6) | - | - | X2 = 5.4, df = 3, P(> X2) = 0.15 |
| < 1/week | 1039 (27.5) | 175 (28.5) | 1.09 (0.86-1.39, p=0.479) | 1.13 (0.87-1.48, p=0.367) |  |
| 1-2/week | 1311 (34.7) | 186 (30.3) | 0.92 (0.73-1.16, p=0.480) | 1.02 (0.78-1.33, p=0.908) |  |
| 3-7/week | 525 (13.9) | 114 (18.6) | 1.41 (1.07-1.84, p=0.013) | 1.38 (1.00-1.90, p=0.049) |  |
| Exercise | < 1/week | 576 (15.3) | 133 (21.7) | - | - | X2 = 10.8, df = 3, P(> X2) = 0.013 |
| 1-2/week | 897 (23.8) | 161 (26.2) | 0.78 (0.60-1.00, p=0.050) | 0.90 (0.68-1.20, p=0.474) |  |
| 3-4/week | 1098 (29.1) | 152 (24.8) | 0.60 (0.47-0.77, p<0.001) | 0.69 (0.52-0.92, p=0.011) |  |
| ≥ 5/week | 1204 (31.9) | 168 (27.4) | 0.60 (0.47-0.78, p<0.001) | 0.68 (0.52-0.91, p=0.008) |  |
| Stress | Very low | 353 (9.4) | 13 (2.1) | - | - | X2 = 101.2, df = 4, P(> X2) < 0.00001 |
| Low | 577 (15.3) | 33 (5.4) | 1.55 (0.83-3.10, p=0.188) | 1.42 (0.74-2.89, p=0.311) |  |
| Moderate | 1721 (45.6) | 249 (40.6) | 3.93 (2.32-7.30, p<0.001) | 3.72 (2.15-7.00, p<0.001) |  |
| High | 845 (22.4) | 224 (36.5) | 7.20 (4.22-13.41, p<0.001) | 6.59 (3.78-12.50, p<0.001) |  |
| Very high | 279 (7.4) | 95 (15.5) | 9.25 (5.25-17.63, p<0.001) | 7.31 (4.03-14.28, p<0.001) |  |
| Coffee | < 1/week | 1454 (38.5) | 192 (31.3) | - | - | X2 = 6.6, df = 5, P(> X2) = 0.25 |
| 1-2/week | 855 (22.6) | 136 (22.1) | 1.20 (0.95-1.52, p=0.121) | 1.21 (0.93-1.57, p=0.147) |  |
| 3-6/week | 631 (16.7) | 99 (16.1) | 1.19 (0.91-1.54, p=0.194) | 1.13 (0.85-1.51, p=0.390) |  |
| 1/day | 461 (12.2) | 91 (14.8) | 1.49 (1.14-1.95, p=0.004) | 1.27 (0.93-1.72, p=0.127) |  |
| 2/day | 251 (6.6) | 61 (9.9) | 1.84 (1.33-2.52, p<0.001) | 1.34 (0.93-1.93, p=0.111) |  |
| ≥ 3/day | 123 (3.3) | 35 (5.7) | 2.15 (1.42-3.20, p<0.001) | 1.61 (1.00-2.53, p=0.043) |  |
| ***Occupational factors*** | |  |  |  |  |  |
| Rank | Private | 291 (7.7) | 32 (5.2) | - | - | X2 = 2.6, df = 3, P(> X2) = 0.45 |
| Private First Class | 1594 (42.2) | 261 (42.5) | 1.49 (1.03-2.23, p=0.044) | 1.40 (0.92-2.19, p=0.125) |  |
| Corporal | 1403 (37.2) | 248 (40.4) | 1.61 (1.10-2.41, p=0.017) | 1.29 (0.84-2.03, p=0.266) |  |
| Sergeant | 487 (12.9) | 73 (11.9) | 1.36 (0.89-2.14, p=0.168) | 1.28 (0.78-2.14, p=0.334) |  |
| Position | Combat arms | 2531 (67.0) | 440 (71.7) | - | - | X2 = 13.5, df = 3, P(> X2) = 0.0038 |
| Driver | 436 (11.5) | 69 (11.2) | 0.91 (0.69-1.19, p=0.501) | 0.85 (0.62-1.14, p=0.285) |  |
| Military chef | 124 (3.3) | 31 (5.0) | 1.44 (0.94-2.13, p=0.080) | 1.38 (0.85-2.20, p=0.178) |  |
| Administration | 684 (18.1) | 74 (12.1) | 0.62 (0.48-0.80, p<0.001) | 0.63 (0.47-0.83, p=0.002) |  |
| Night-shift with duty-off | None | 2090 (55.4) | 372 (60.6) | - | - | X2 = 11.9, df = 5, P(> X2) = 0.036 |
| <1/month | 205 (5.4) | 31 (5.0) | 0.85 (0.56-1.24, p=0.417) | 0.91 (0.57-1.40, p=0.672) |  |
| 2/month | 329 (8.7) | 43 (7.0) | 0.73 (0.52-1.02, p=0.072) | 0.71 (0.49-1.02, p=0.074) |  |
| 3/month | 360 (9.5) | 70 (11.4) | 1.09 (0.82-1.44, p=0.534) | 1.04 (0.75-1.42, p=0.808) |  |
| 4/month | 277 (7.3) | 22 (3.6) | 0.45 (0.28-0.68, p<0.001) | 0.48 (0.29-0.76, p=0.003) |  |
| ≥ 5/month | 514 (13.6) | 76 (12.4) | 0.83 (0.63-1.08, p=0.170) | 0.92 (0.67-1.24, p=0.589) |  |
| Night-shift without duty-off | None | 2093 (55.4) | 330 (53.7) | - | - | X2 = 1.6, df = 5, P(> X2) = 0.9 |
| <1/month | 129 (3.4) | 25 (4.1) | 1.23 (0.77-1.88, p=0.362) | 1.23 (0.73-1.98, p=0.414) |  |
| 2/month | 159 (4.2) | 29 (4.7) | 1.16 (0.75-1.72, p=0.489) | 1.18 (0.74-1.84, p=0.471) |  |
| 3/month | 157 (4.2) | 22 (3.6) | 0.89 (0.55-1.38, p=0.616) | 0.95 (0.56-1.54, p=0.835) |  |
| 4/month | 189 (5.0) | 29 (4.7) | 0.97 (0.64-1.44, p=0.896) | 0.96 (0.60-1.49, p=0.855) |  |
| ≥ 5/month | 1048 (27.8) | 179 (29.2) | 1.08 (0.89-1.32, p=0.425) | 1.08 (0.86-1.35, p=0.504) |  |

Odds ratio (OR), 95% confidence intervals, and p-value are presented. Body mass index (BMI)

## **Table S4.** Characteristics of military service members according to positions

|  |  | Combat arms (n=2,971) | Driver (n=505) | Military chef (n=155) | Administration (n=758) | *p* value |
| --- | --- | --- | --- | --- | --- | --- |
| ***Demographics and Lifestyle*** | |  |  |  |  |  |
| Age, years | Mean (SD) | 20.8 (1.2) | 20.8 (1.2) | 20.9 (1.4) | 21.0 (1.4) | <0.001 |
| Education | ≤ High school | 2804 (94.4) | 482 (95.4) | 147 (94.8) | 693 (91.4) | 0.008 |
|  | College or higher | 167 (5.6) | 23 (4.6) | 8 (5.2) | 65 (8.6) |  |
| BMI, kg/m2 | Mean (SD) | 23.8 (2.9) | 24.3 (2.9) | 23.4 (3.0) | 23.7 (2.6) | <0.001 |
| Smoking | Never | 1529 (51.5) | 277 (54.9) | 78 (50.3) | 439 (57.9) | 0.002 |
| Past smoker | 183 (6.2) | 20 (4.0) | 5 (3.2) | 53 (7.0) |  |
| Current smoker | 1259 (42.4) | 208 (41.2) | 72 (46.5) | 266 (35.1) |  |
| Drinking | < 1/month | 701 (23.6) | 98 (19.4) | 46 (29.7) | 194 (25.6) | 0.029 |
| < 1/week | 842 (28.3) | 155 (30.7) | 39 (25.2) | 178 (23.5) |  |
| 1-2/week | 987 (33.2) | 180 (35.6) | 49 (31.6) | 281 (37.1) |  |
| 3-7/week | 441 (14.8) | 72 (14.3) | 21 (13.5) | 105 (13.9) |  |
| Exercise | < 1/week | 459 (15.4) | 81 (16.0) | 50 (32.3) | 119 (15.7) | <0.001 |
| 1-2/week | 709 (23.9) | 125 (24.8) | 35 (22.6) | 189 (24.9) |  |
| 3-4/week | 844 (28.4) | 165 (32.7) | 27 (17.4) | 214 (28.2) |  |
| ≥ 5/week | 959 (32.3) | 134 (26.5) | 43 (27.7) | 236 (31.1) |  |
| Stress | Very low | 253 (8.5) | 42 (8.3) | 12 (7.7) | 59 (7.8) | 0.055 |
| Low | 417 (14.0) | 82 (16.2) | 12 (7.7) | 99 (13.1) |  |
| Moderate | 1325 (44.6) | 246 (48.7) | 68 (43.9) | 331 (43.7) |  |
| High | 719 (24.2) | 102 (20.2) | 44 (28.4) | 204 (26.9) |  |
| Very high | 257 (8.7) | 33 (6.5) | 19 (12.3) | 65 (8.6) |  |
| Coffee | < 1/week | 1133 (38.1) | 183 (36.2) | 59 (38.1) | 271 (35.8) | 0.028 |
| 1-2/week | 685 (23.1) | 119 (23.6) | 30 (19.4) | 157 (20.7) |  |
| 3-6/week | 476 (16.0) | 100 (19.8) | 22 (14.2) | 132 (17.4) |  |
| 1/day | 371 (12.5) | 54 (10.7) | 27 (17.4) | 100 (13.2) |  |
| 2/day | 203 (6.8) | 40 (7.9) | 13 (8.4) | 56 (7.4) |  |
| ≥ 3/day | 103 (3.5) | 9 (1.8) | 4 (2.6) | 42 (5.5) |  |
| ***Occupational factors*** | |  |  |  |  |  |
| Rank | Private | 258 (8.7) | 7 (1.4) | 11 (7.1) | 47 (6.2) | <0.001 |
| Private First Class | 1199 (40.4) | 245 (48.5) | 75 (48.4) | 336 (44.3) |  |
| Corporal | 1112 (37.4) | 198 (39.2) | 59 (38.1) | 282 (37.2) |  |
| Sergeant | 402 (13.5) | 55 (10.9) | 10 (6.5) | 93 (12.3) |  |
| Night shift with duty-off a | None | 1633 (55.0) | 380 (75.2) | 154 (99.4) | 295 (38.9) | <0.001 |
| <1/month | 196 (6.6) | 12 (2.4) | 0 (0.0) | 28 (3.7) |  |
| 2/month | 279 (9.4) | 28 (5.5) | 0 (0.0) | 65 (8.6) |  |
| 3/month | 314 (10.6) | 33 (6.5) | 0 (0.0) | 83 (10.9) |  |
| 4/month | 204 (6.9) | 28 (5.5) | 0 (0.0) | 67 (8.8) |  |
| ≥ 5/month | 345 (11.6) | 24 (4.8) | 1 (0.6) | 220 (29.0) |  |
| Night shift without duty-off a | None | 1583 (53.3) | 256 (50.7) | 149 (96.1) | 435 (57.4) | <0.001 |
| <1/month | 107 (3.6) | 19 (3.8) | 0 (0.0) | 28 (3.7) |  |
| 2/month | 146 (4.9) | 15 (3.0) | 2 (1.3) | 25 (3.3) |  |
| 3/month | 126 (4.2) | 16 (3.2) | 1 (0.6) | 36 (4.7) |  |
| 4/month | 148 (5.0) | 46 (9.1) | 0 (0.0) | 24 (3.2) |  |
| ≥ 5/month | 861 (29.0) | 153 (30.3) | 3 (1.9) | 210 (27.7) |  |
| ***Dietary patterns*** | |  |  |  |  |  |
| Skipping breakfast | None | 2099 (70.6) | 400 (79.2) | 77 (49.7) | 474 (62.5) | <0.001 |
| 1-2/week | 555 (18.7) | 68 (13.5) | 40 (25.8) | 142 (18.7) |  |
| 3-4/ week | 202 (6.8) | 20 (4.0) | 24 (15.5) | 90 (11.9) |  |
| 5-6/week | 64 (2.2) | 8 (1.6) | 9 (5.8) | 39 (5.1) |  |
| 7/week | 51 (1.7) | 9 (1.8) | 5 (3.2) | 13 (1.7) |  |
| Overeating | None | 1614 (54.3) | 304 (60.2) | 90 (58.1) | 408 (53.8) | 0.147 |
| 1-2/week | 1005 (33.8) | 154 (30.5) | 49 (31.6) | 263 (34.7) |  |
| 3-4/ week | 247 (8.3) | 40 (7.9) | 11 (7.1) | 69 (9.1) |  |
| 5-6/week | 48 (1.6) | 2 (0.4) | 1 (0.6) | 11 (1.5) |  |
| 7/week | 57 (1.9) | 5 (1.0) | 4 (2.6) | 7 (0.9) |  |
| Snack | None | 261 (8.8) | 47 (9.3) | 23 (14.8) | 87 (11.5) | 0.133 |
| 1-2/week | 775 (26.1) | 126 (25.0) | 49 (31.6) | 215 (28.4) |  |
| 3-4/week | 656 (22.1) | 125 (24.8) | 30 (19.4) | 166 (21.9) |  |
| 5-6/week | 224 (7.5) | 41 (8.1) | 8 (5.2) | 39 (5.1) |  |
| 1/day | 540 (18.2) | 89 (17.6) | 25 (16.1) | 130 (17.2) |  |
| 2/day | 350 (11.8) | 53 (10.5) | 14 (9.0) | 83 (10.9) |  |
| ≥ 3/day | 165 (5.6) | 24 (4.8) | 6 (3.9) | 38 (5.0) |  |
| Night meal | None | 1602 (53.9) | 334 (66.1) | 91 (58.7) | 381 (50.3) | <0.001 |
| 1-3/month | 487 (16.4) | 58 (11.5) | 24 (15.5) | 125 (16.5) |  |
| 1-2/week | 592 (19.9) | 83 (16.4) | 22 (14.2) | 179 (23.6) |  |
| 3-4/ week | 199 (6.7) | 17 (3.4) | 15 (9.7) | 52 (6.9) |  |
| 5-6/week | 38 (1.3) | 4 (0.8) | 0 (0.0) | 10 (1.3) |  |
| 7/week | 53 (1.8) | 9 (1.8) | 3 (1.9) | 11 (1.5) |  |
| ***Sleep characteristics*** | |  |  |  |  |  |
| PSQI global score | Mean (SD) | 6.7 (3.4) | 6.1 (3.3) | 7.1 (3.3) | 7.2 (3.4) | <0.001 |
| Berlin Questionnaire | low-risk OSA | 2531 (85.2) | 436 (86.3) | 124 (80.0) | 684 (90.2) | 0.001 |
| high-risk OSA | 440 (14.8) | 69 (13.7) | 31 (20.0) | 74 (9.8) |  |

a Going off duty right after night shift; Pittsburgh sleep quality index (PSQI); Body mass index (BMI)

## **Table S5.** Results of the dietary habit survey questionnaire administered among the military service members

|  |  | Sleep Quality | | | OSA | | |
| --- | --- | --- | --- | --- | --- | --- | --- |
|  |  | PSQI ≤ 5  (n=1,810) | PSQI > 5  (n=2,579) | *p* value | Low risk  (n=3,775) | High risk  (n=614) | *p* value |
| How many times do you have a meal per day? | 1 time | 4 (0.2) | 8 (0.3) | <0.001 | 9 (0.2) | 3 (0.5) | 0.106 |
| 2 times | 72 (4.0) | 208 (8.1) |  | 230 (6.1) | 50 (8.1) |  |
| 3 times | 1666 (92.0) | 2234 (86.6) |  | 3371 (89.3) | 529 (86.2) |  |
| ≥ 4 times | 68 (3.8) | 129 (5.0) |  | 165 (4.4) | 32 (5.2) |  |
| Do you have a meal regularly? | Very regularly (6-7/week) | 1494 (82.5) | 1827 (70.8) | <0.001 | 2871 (76.1) | 450 (73.3) | 0.309 |
| Regularly (4-5/week) | 283 (15.6) | 650 (25.2) |  | 794 (21.0) | 139 (22.6) |  |
| Irregularly (2-3/week) | 30 (1.7) | 86 (3.3) |  | 95 (2.5) | 21 (3.4) |  |
| Very irregularly (≤1/week) | 3 (0.2) | 16 (0.6) |  | 15 (0.4) | 4 (0.7) |  |
| How much do you eat for a meal? | Very insufficient | 7 (0.4) | 12 (0.5) | 0.002 | 16 (0.4) | 3 (0.5) | 0.024 |
| Somewhat insufficient | 99 (5.5) | 218 (8.5) |  | 270 (7.2) | 47 (7.7) |  |
| Moderate | 896 (49.5) | 1187 (46.0) |  | 1813 (48.0) | 270 (44.0) |  |
| A little bit full | 696 (38.5) | 1016 (39.4) |  | 1471 (39.0) | 241 (39.3) |  |
| Very full | 112 (6.2) | 146 (5.7) |  | 205 (5.4) | 53 (8.6) |  |
| How long does it take to finish a meal? | ≤ 10 min | 555 (30.7) | 862 (33.4) | 0.001 | 1207 (32.0) | 210 (34.2) | 0.293 |
| 10-20 min | 1131 (62.5) | 1497 (58.0) |  | 2277 (60.3) | 351 (57.2) |  |
| 20-30 min | 119 (6.6) | 194 (7.5) |  | 267 (7.1) | 46 (7.5) |  |
| > 30 min | 5 (0.3) | 26 (1.0) |  | 24 (0.6) | 7 (1.1) |  |
| If you skip a meal, which meal would it be usually? | Do not skip a meal | 1212 (67.0) | 1390 (53.9) | <0.001 | 2285 (60.5) | 317 (51.6) | <0.001 |
| Supper | 155 (8.6) | 285 (11.1) |  | 347 (9.2) | 93 (15.1) |  |
| Lunch | 37 (2.0) | 77 (3.0) |  | 91 (2.4) | 23 (3.7) |  |
| Breakfast | 406 (22.4) | 827 (32.1) |  | 1052 (27.9) | 181 (29.5) |  |
| How many times do you skip breakfast? | None | 1392 (76.9) | 1658 (64.3) | <0.001 | 2655 (70.3) | 395 (64.3) | <0.001 |
| 1–2/week | 269 (14.9) | 536 (20.8) |  | 683 (18.1) | 122 (19.9) |  |
| 3–4/week | 94 (5.2) | 242 (9.4) |  | 283 (7.5) | 53 (8.6) |  |
| 5–6/week | 29 (1.6) | 91 (3.5) |  | 100 (2.6) | 20 (3.3) |  |
| 7/week | 26 (1.4) | 52 (2.0) |  | 54 (1.4) | 24 (3.9) |  |
| What is the main reason for skipping breakfast? | Do not skip a breakfast | 1021 (56.4) | 1180 (45.8) | <0.001 | 1917 (50.8) | 284 (46.3) | 0.253 |
| Oversleep | 115 (6.4) | 164 (6.4) |  | 238 (6.3) | 41 (6.7) |  |
| No time for breakfast | 52 (2.9) | 99 (3.8) |  | 132 (3.5) | 19 (3.1) |  |
| Have no appetite | 355 (19.6) | 673 (26.1) |  | 870 (23.0) | 158 (25.7) |  |
| Need to lose weight | 45 (2.5) | 82 (3.2) |  | 105 (2.8) | 22 (3.6) |  |
| Do not digest well | 47 (2.6) | 95 (3.7) |  | 115 (3.0) | 27 (4.4) |  |
| Habitually | 28 (1.5) | 46 (1.8) |  | 67 (1.8) | 7 (1.1) |  |
| Breakfast is not prepared | 7 (0.4) | 13 (0.5) |  | 16 (0.4) | 4 (0.7) |  |
| Others | 140 (7.7) | 227 (8.8) |  | 315 (8.3) | 52 (8.5) |  |
| How many times do you have dinner with other people (more than one member?) | 7/week | 1544 (85.3) | 2074 (80.4) | <0.001 | 3124 (82.8) | 494 (80.5) | 0.025 |
| 5-6/week | 148 (8.2) | 256 (9.9) |  | 350 (9.3) | 54 (8.8) |  |
| 3-4/week | 68 (3.8) | 148 (5.7) |  | 185 (4.9) | 31 (5.0) |  |
| 1-2/week | 28 (1.5) | 48 (1.9) |  | 58 (1.5) | 18 (2.9) |  |
| < 1-3/month | 22 (1.2) | 53 (2.1) |  | 58 (1.5) | 17 (2.8) |  |
| How often do you overeat? | Seldom overeat | 1312 (50.9) | <0.001 | 2143 (56.8) | 273 (44.5) | <0.001 | 1312 (50.9) |
| 1–2/week | 922 (35.8) |  | 1260 (33.4) | 211 (34.4) |  | 922 (35.8) |
| 3–4/ week | 259 (10.0) |  | 278 (7.4) | 89 (14.5) |  | 259 (10.0) |
| 5–6/week | 42 (1.6) |  | 43 (1.1) | 19 (3.1) |  | 42 (1.6) |
| 7/week | 44 (1.7) |  | 51 (1.4) | 22 (3.6) |  | 44 (1.7) |
| At which meal do you usually overeat? | None | 972 (53.7) | 1102 (42.7) | <0.001 | 1838 (48.7) | 236 (38.4) | <0.001 |
| Breakfast | 17 (0.9) | 35 (1.4) |  | 41 (1.1) | 11 (1.8) |  |
| Lunch | 246 (13.6) | 424 (16.4) |  | 551 (14.6) | 119 (19.4) |  |
| Supper | 575 (31.8) | 1018 (39.5) |  | 1345 (35.6) | 248 (40.4) |  |
| How often do you eat out? (excludes the meals provided at work and includes the food delivered) | Do not eat out | 448 (24.8) | 490 (19.0) | <0.001 | 834 (22.1) | 104 (16.9) | 0.003 |
| 1-3/month | 444 (24.5) | 633 (24.5) |  | 921 (24.4) | 156 (25.4) |  |
| 1-2/week | 494 (27.3) | 671 (26.0) |  | 1008 (26.7) | 157 (25.6) |  |
| 3-4/week | 295 (16.3) | 523 (20.3) |  | 698 (18.5) | 120 (19.5) |  |
| 5-6/week | 65 (3.6) | 126 (4.9) |  | 155 (4.1) | 36 (5.9) |  |
| 7/week | 64 (3.5) | 136 (5.3) |  | 159 (4.2) | 41 (6.7) |  |
| How often do you have snacks? (snacks refer to foods between meals) | Do not have snacks | 218 (12.0) | 200 (7.8) | <0.001 | 374 (9.9) | 44 (7.2) | 0.023 |
| 1-2/week | 484 (26.7) | 681 (26.4) |  | 1000 (26.5) | 165 (26.9) |  |
| 3-4/week | 408 (22.5) | 569 (22.1) |  | 861 (22.8) | 116 (18.9) |  |
| 5-6/week | 122 (6.7) | 190 (7.4) |  | 268 (7.1) | 44 (7.2) |  |
| 1/day | 314 (17.3) | 470 (18.2) |  | 664 (17.6) | 120 (19.5) |  |
| 2/day | 190 (10.5) | 310 (12.0) |  | 415 (11.0) | 85 (13.8) |  |
| ≥3/day | 74 (4.1) | 159 (6.2) |  | 193 (5.1) | 40 (6.5) |  |
| When do you usually have snacks? | None | 207 (11.4) | 186 (7.2) | <0.001 | 353 (9.4) | 40 (6.5) | 0.157 |
| Between breakfast and lunch | 65 (3.6) | 107 (4.1) |  | 150 (4.0) | 22 (3.6) |  |
| Between lunch and supper | 401 (22.2) | 609 (23.6) |  | 859 (22.8) | 151 (24.6) |  |
| After supper | 419 (23.1) | 667 (25.9) |  | 939 (24.9) | 147 (23.9) |  |
| Anytime | 718 (39.7) | 1010 (39.2) |  | 1474 (39.0) | 254 (41.4) |  |
| How often do you have night meals? (night meals refer to the food you eat at night after dinner) | Do not eat night meals | 1101 (60.8) | 1307 (50.7) | <0.001 | 2105 (55.8) | 303 (49.3) | 0.001 |
| 1-3/month | 275 (15.2) | 419 (16.2) |  | 599 (15.9) | 95 (15.5) |  |
| 1-2/week | 325 (18.0) | 551 (21.4) |  | 744 (19.7) | 132 (21.5) |  |
| 3-4/week | 78 (4.3) | 205 (7.9) |  | 230 (6.1) | 53 (8.6) |  |
| 5-6/week | 7 (0.4) | 45 (1.7) |  | 41 (1.1) | 11 (1.8) |  |
| 7/week | 24 (1.3) | 52 (2.0) |  | 56 (1.5) | 20 (3.3) |  |
| Is there a food item you do not eat? | No | 1467 (81.0) | 1920 (74.4) | <0.001 | 2940 (77.9) | 447 (72.8) | 0.006 |
| Yes | 343 (19.0) | 659 (25.6) |  | 835 (22.1) | 167 (27.2) |  |
| What is the reason for not eating that food? | None | 878 (48.5) | 1025 (39.7) | <0.001 | 1677 (44.4) | 226 (36.8) | 0.003 |
| Bad taste | 552 (30.5) | 854 (33.1) |  | 1201 (31.8) | 205 (33.4) |  |
| Never tried before | 51 (2.8) | 64 (2.5) |  | 97 (2.6) | 18 (2.9) |  |
| Allergic | 65 (3.6) | 151 (5.9) |  | 170 (4.5) | 46 (7.5) |  |
| Dislike the smell, shape, or texture | 100 (5.5) | 201 (7.8) |  | 252 (6.7) | 49 (8.0) |  |
| Bad experiences in the past | 101 (5.6) | 176 (6.8) |  | 232 (6.1) | 45 (7.3) |  |
| Others | 63 (3.5) | 108 (4.2) |  | 146 (3.9) | 25 (4.1) |  |
| How often do you have the following food? | | | | | | | |
| Grain (rice, bread, potatoes, etc) | Rarely | 60 (3.3) | 51 (2.0) | 0.001 | 95 (2.5) | 16 (2.6) | 0.982 |
| 1-2/week | 125 (6.9) | 153 (5.9) |  | 242 (6.4) | 36 (5.9) |  |
| 3-4/week | 93 (5.1) | 146 (5.7) |  | 204 (5.4) | 35 (5.7) |  |
| 5-6/week | 56 (3.1) | 96 (3.7) |  | 132 (3.5) | 20 (3.3) |  |
| 1/day | 76 (4.2) | 89 (3.5) |  | 145 (3.8) | 20 (3.3) |  |
| 2/day | 156 (8.6) | 302 (11.7) |  | 391 (10.4) | 67 (10.9) |  |
| ≥3/day | 1244 (68.7) | 1742 (67.5) |  | 2566 (68.0) | 420 (68.4) |  |
| Meat, fish, egg, or bean | Rarely | 58 (3.2) | 65 (2.5) | 0.249 | 100 (2.6) | 23 (3.7) | 0.41 |
| 1-2/week | 89 (4.9) | 108 (4.2) |  | 174 (4.6) | 23 (3.7) |  |
| 3-4/week | 119 (6.6) | 200 (7.8) |  | 276 (7.3) | 43 (7.0) |  |
| 5-6/week | 88 (4.9) | 117 (4.5) |  | 182 (4.8) | 23 (3.7) |  |
| 1/day | 148 (8.2) | 232 (9.0) |  | 334 (8.8) | 46 (7.5) |  |
| 2/day | 394 (21.8) | 600 (23.3) |  | 852 (22.6) | 142 (23.1) |  |
| ≥3/day | 914 (50.5) | 1257 (48.7) |  | 1857 (49.2) | 314 (51.1) |  |
| Fruits | Rarely | 236 (13.0) | 428 (16.6) | <0.001 | 549 (14.5) | 115 (18.7) | 0.009 |
| 1-2/week | 623 (34.4) | 1011 (39.2) |  | 1397 (37.0) | 237 (38.6) |  |
| 3-4/week | 408 (22.5) | 576 (22.3) |  | 859 (22.8) | 125 (20.4) |  |
| 5-6/week | 136 (7.5) | 162 (6.3) |  | 251 (6.6) | 47 (7.7) |  |
| 1/day | 246 (13.6) | 225 (8.7) |  | 426 (11.3) | 45 (7.3) |  |
| 2/day | 66 (3.6) | 79 (3.1) |  | 128 (3.4) | 17 (2.8) |  |
| ≥3/day | 95 (5.2) | 98 (3.8) |  | 165 (4.4) | 28 (4.6) |  |
| Vegetables (including seaweeds) | Rarely | 101 (5.6) | 157 (6.1) | 0.189 | 233 (6.2) | 25 (4.1) | 0.271 |
| 1-2/week | 148 (8.2) | 242 (9.4) |  | 330 (8.7) | 60 (9.8) |  |
| 3-4/week | 209 (11.5) | 342 (13.3) |  | 469 (12.4) | 82 (13.4) |  |
| 5-6/week | 123 (6.8) | 187 (7.3) |  | 273 (7.2) | 37 (6.0) |  |
| 1/day | 208 (11.5) | 286 (11.1) |  | 423 (11.2) | 71 (11.6) |  |
| 2/day | 329 (18.2) | 469 (18.2) |  | 694 (18.4) | 104 (16.9) |  |
| ≥3/day | 692 (38.2) | 896 (34.7) |  | 1353 (35.8) | 235 (38.3) |  |
| Dairy food (yogurt, cheese, etc) | Rarely | 123 (6.8) | 180 (7.0) | 0.009 | 258 (6.8) | 45 (7.3) | 0.346 |
| 1-2/week | 129 (7.1) | 223 (8.6) |  | 303 (8.0) | 49 (8.0) |  |
| 3-4/week | 186 (10.3) | 298 (11.6) |  | 419 (11.1) | 65 (10.6) |  |
| 5-6/week | 156 (8.6) | 276 (10.7) |  | 365 (9.7) | 67 (10.9) |  |
| 1/day | 632 (34.9) | 888 (34.4) |  | 1305 (34.6) | 215 (35.0) |  |
| 2/day | 320 (17.7) | 393 (15.2) |  | 632 (16.7) | 81 (13.2) |  |
| ≥3/day | 264 (14.6) | 321 (12.4) |  | 493 (13.1) | 92 (15.0) |  |
| How often do you have the following food? | | | | | | | |
| Fatty foods such as fried foods, bacon, and ribs | Rarely | 256 (14.1) | 326 (12.6) | 0.013 | 504 (13.4) | 78 (12.7) | <0.001 |
| 1-3/month | 285 (15.7) | 360 (14.0) |  | 557 (14.8) | 88 (14.3) |  |
| 1-2/week | 609 (33.6) | 818 (31.7) |  | 1265 (33.5) | 162 (26.4) |  |
| 3-4/week | 520 (28.7) | 846 (32.8) |  | 1156 (30.6) | 210 (34.2) |  |
| ≥5/week | 140 (7.7) | 229 (8.9) |  | 293 (7.8) | 76 (12.4) |  |
| Instant foods (ramen, instant cooking food, etc) | Rarely | 294 (16.2) | 331 (12.8) | 0.001 | 550 (14.6) | 75 (12.2) | 0.001 |
| 1-3/month | 360 (19.9) | 499 (19.3) |  | 741 (19.6) | 118 (19.2) |  |
| 1-2/week | 765 (42.3) | 1070 (41.5) |  | 1593 (42.2) | 242 (39.4) |  |
| 3-4/week | 335 (18.5) | 568 (22.0) |  | 764 (20.2) | 139 (22.6) |  |
| ≥5/week | 56 (3.1) | 111 (4.3) |  | 127 (3.4) | 40 (6.5) |  |
| Fast food (pizza, chicken, hamburger, etc) | Rarely | 806 (44.5) | 1137 (44.1) | 0.237 | 1687 (44.7) | 256 (41.7) | 0.002 |
| 1-3/month | 575 (31.8) | 823 (31.9) |  | 1210 (32.1) | 188 (30.6) |  |
| 1-2/week | 356 (19.7) | 481 (18.7) |  | 709 (18.8) | 128 (20.8) |  |
| 3-4/week | 63 (3.5) | 111 (4.3) |  | 145 (3.8) | 29 (4.7) |  |
| ≥5/week | 10 (0.6) | 27 (1.0) |  | 24 (0.6) | 13 (2.1) |  |
